# Supplementary material for: Growth, spectral and laser properties of a Yb-doped strontium yttrium phosphate crystal with a disordered structure
Source: Royal Society of Chemistry journal article supplement (doi:10.1039/d1ce01008e), 2021-01-01
Supplement: d1ce01008e1.pdf [file d1ce01008e1.pdf]

## Supporting Information

### Growth, spectral and laser properties of Yb-doped strontium yttrium phosphate crystal with a disordered structure

Guangda Wu,<sup>a</sup> Xiaoqin Yin,<sup>b</sup> Pingzhang Yu,<sup>a</sup> Mengdi Fan,<sup>b</sup> Fapeng Yu,<sup>\*a,b</sup> Shuzhen Fan,<sup>\*a,b</sup> Zhengping Wang,<sup>a</sup> and Xian Zhao<sup>\*a,b</sup>

**Figure S1.** Schematic of laser experimental configuration.

**Table S1.** Structure parameters of the Yb:YSP crystal obtained from the Rietveld data.

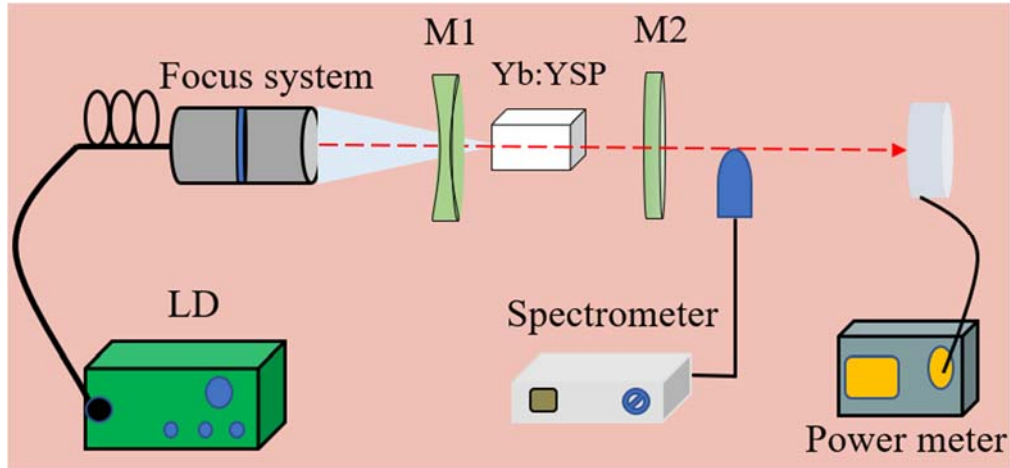

**Figure S1.** Schematic of laser experimental configuration.

**Table S1.** Structure parameters of the Yb:YSP crystal obtained from the Rietveld data.

| Atoms | Site | $x$     | $y$     | $z$     | Occupancy |
|-------|------|---------|---------|---------|-----------|
| Yb    | 16c  | 0.93606 | 0.56394 | 0.43606 | 0.005     |
| Y     | 16c  | 0.93606 | 0.56394 | 0.43606 | 0.078     |
| Sr    | 16c  | 0.93606 | 0.56394 | 0.43606 | 0.250     |
| P     | 12a  | 0.87500 | 0.50000 | 0.75000 | 0.250     |
| O1    | 48e  | 0.94575 | 0.39747 | 0.69445 | 0.650     |
| O2    | 48e  | 0.98904 | 0.31314 | 0.78806 | 0.350     |

Lattice parameters:  $a = b = c = 10.0809 \text{ \AA}$ ;  $\alpha = \beta = \gamma = 90^\circ$   
Volume =  $1024.467 \text{ \AA}^3$ ; space group:  $I-43d$  (No.220)  
R factor:  $R_p = 0.921\%$ ,  $R_{wp} = 1.42\%$
